# Supplementary material for: Additive manufacturing of barium-doped calcium silicate/poly-ε-caprolactone scaffolds to activate CaSR and AKT signalling and osteogenic differentiation of mesenchymal stem cells
Source: Royal Society of Chemistry journal article supplement (doi:10.1039/d3tb00208j), 2023-01-01
Supplement: d3tb00208j8.pdf [file d3tb00208j8.pdf]

## Supporting Information

### **Additive manufacturing of barium-doped calcium silicate/poly-ε-caprolactone scaffold activated CaSR and AKT signalling on osteogenic differentiation of mesenchymal stem cells**

Yung-Cheng Chiu <sup>a,b</sup>, Yen-Hong Lin <sup>c</sup>, Yi-Wen Chen <sup>c,d</sup>, Ting-You Kuo <sup>d</sup>, Ming-You Shie <sup>c,e,f,\*</sup>

---

<sup>a.</sup> *School of Medicine, China Medical University, Taichung City, Taiwan.*

<sup>b.</sup> *Department of Orthopedic Surgery, China Medical University Hospital, Taichung 40447, Taiwan*

<sup>c.</sup> *x-Dimension Center for Medical Research and Translation, China Medical University Hospital, Taichung 404332, Taiwan*

<sup>d.</sup> *Graduate Institute of Biomedical Sciences, China Medical University, Taichung City, Taiwan*

<sup>e.</sup> *School of Dentistry, China Medical University, Taichung 406040, Taiwan*

<sup>f.</sup> *Department of Bioinformatics and Medical Engineering, Asia University, Taichung 41354, Taiwan*

### **Biocompatibility of BaCS scaffolds extracts**

The indirect biocompatibility was investigated by following a revised version of ISO10993-5. First, we manufactured the 3d-printed BaCS scaffold which was subsequently washed with PBS twice, followed by sterilization in 75% ethanol at room temperature in a laminar flow for 60 min. To get the extracts of these scaffolds, the different groups were then soaked in Dulbecco's modified Eagle's Medium (DMEM) and placed in a 37°C incubator with the settings of 75% humidity and 5% CO<sub>2</sub> for 24 h. Concurrently, WJMSC (104 cells) were cultured in a 96-well at 37°C for 24 h. Then, the medium was removed and replaced with 100 µL/well of the various scaffolds extract solution. After 1 day of cell culture, the extract solution was removed and replaced with 100 µL of MTT solution (5 mg/mL) in each well. The culture was then left to be incubated for 3 h in the dark. Then, MTT solution was removed and replaced with 100 µL of dimethyl sulfoxide to dissolve the formed formazan by MTT solution. A microplate reader was used to analyze for absorbances of each well.

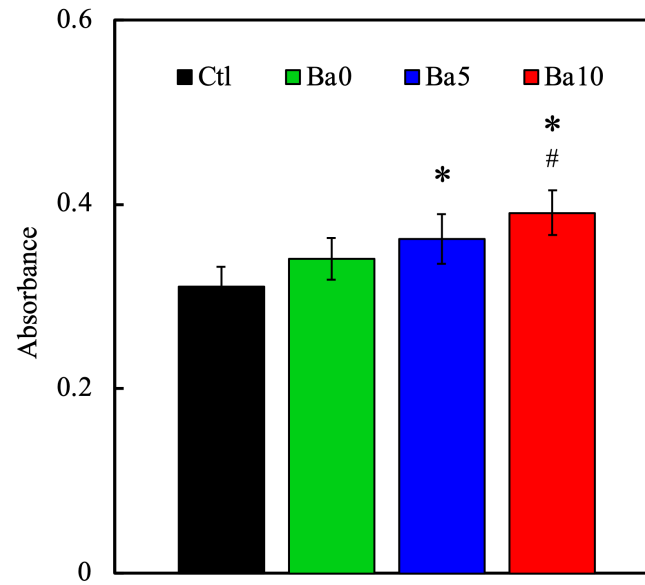

Figure S1. The biocompatibility of WJMSCs cultured on the extracts from scaffolds for 1 day. \* indicates a significant difference ( $p < 0.05$ ) from Ctl. # indicates a significant difference ( $p < 0.05$ ) from Ba0. Data are presented as means  $\pm$  SEM;  $n = 6$  for each group.
