# Supplementary figures and images for: Additive manufacturing of barium-doped calcium silicate/poly-ε-caprolactone scaffolds to activate CaSR and AKT signalling and osteogenic differentiation of mesenchymal stem cells
Source: Royal Society of Chemistry journal article supplement (doi:10.1039/d3tb00208j), 2023-01-01

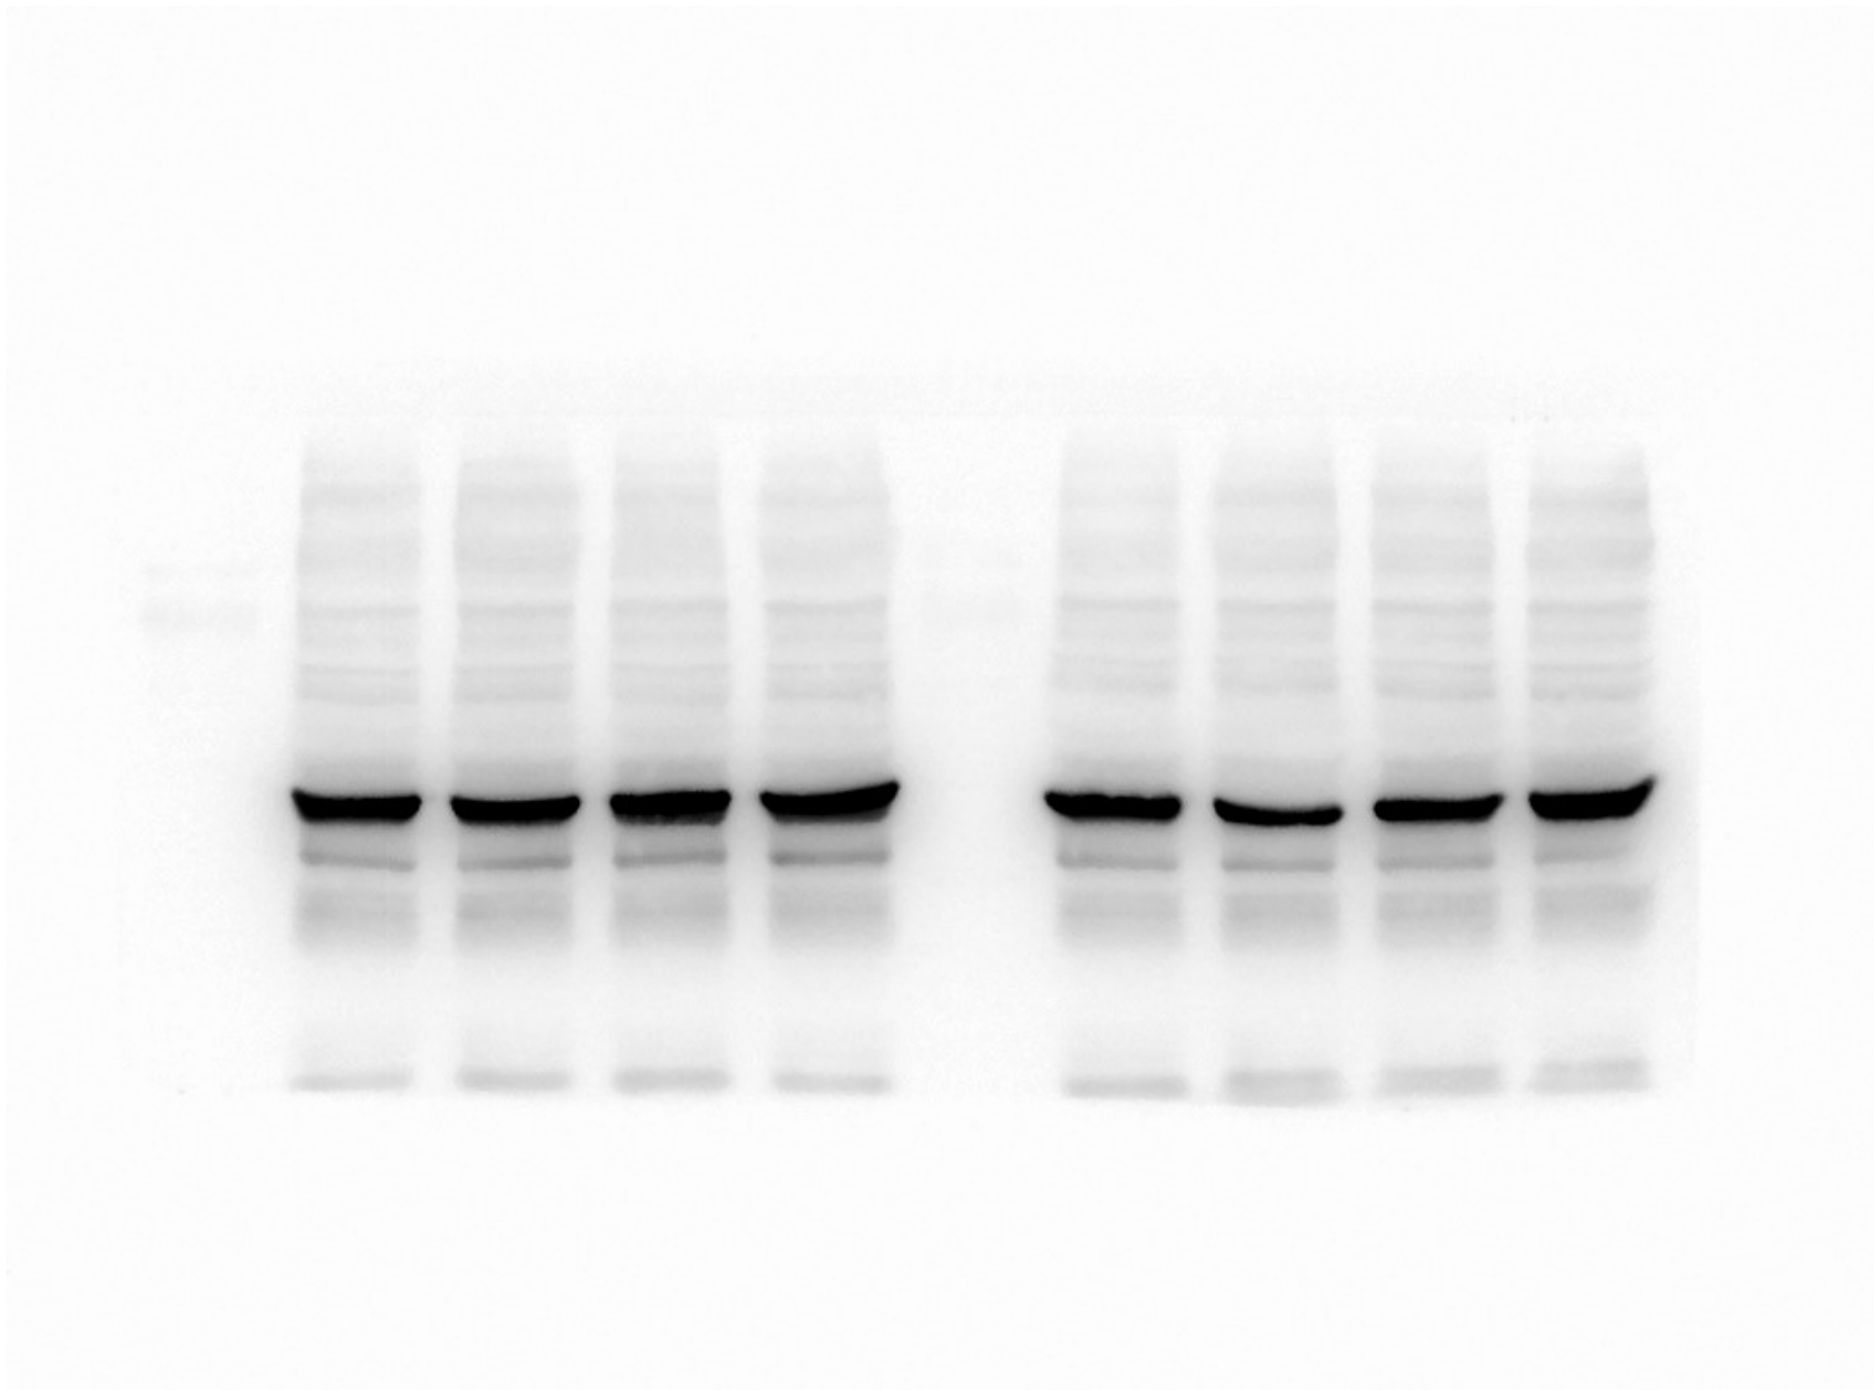

Supplement: d3tb00208j1.pdf [file d3tb00208j1.pdf]

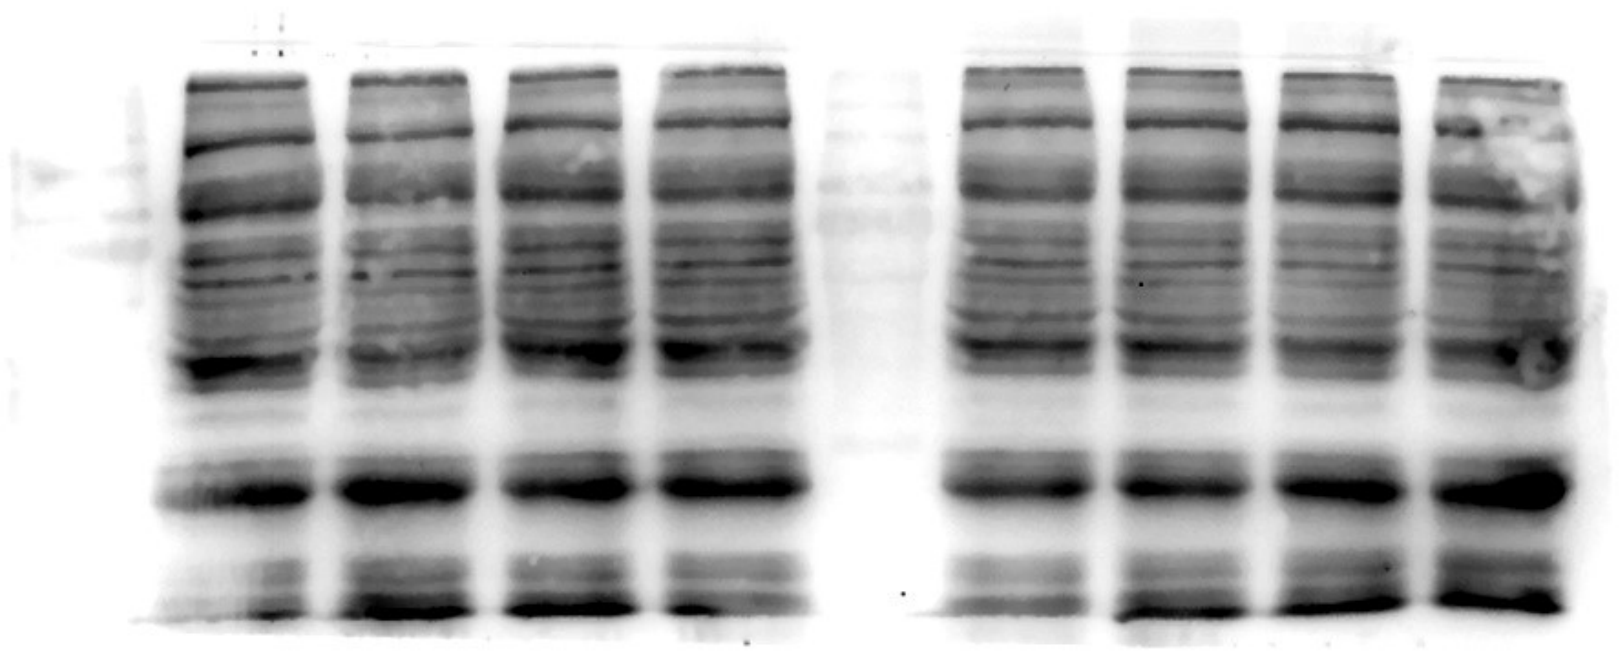

Supplement: d3tb00208j4.pdf [file d3tb00208j4.pdf]

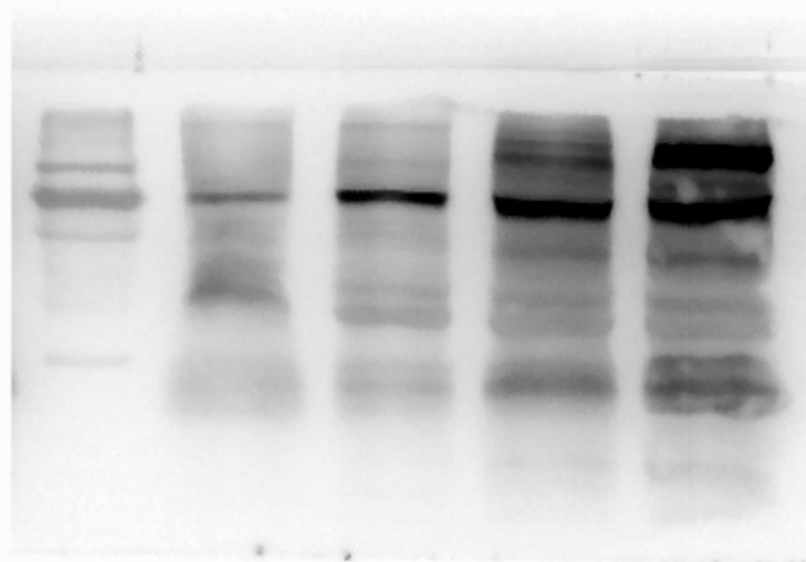

Supplement: d3tb00208j5.pdf [file d3tb00208j5.pdf]
